# Supplementary material for: Molecular stacking structure and field-effect transistor characteristics of crystalline poly(3-hexylthiophene)-block-syndiotactic polypropylene through solvent selectivity
Source: Royal Society of Chemistry journal article supplement (doi:10.1039/c4ra03571b), 2014-01-01
Supplement: c4ra03571b1.pdf [file c4ra03571b1.pdf]

## Supporting Information

### **Molecular Stacking Structure and Field-Effect Transistor Characteristics of Crystalline Poly(3-hexylthiophene)-*block*-Syndiotactic Polypropylene through Solvent Selectivity**

*Chen-Tsyrr Lo,<sup>1</sup> Chih-Jung Lin,<sup>1</sup> Jing-Yu Lee,<sup>2</sup> Shih-Huang Tung,<sup>3</sup>*

*Jing-Cherng Tsai,<sup>2,\*</sup> and Wen-Chang Chen<sup>1,\*</sup>*

<sup>1</sup>Department of Chemical Engineering, National Taiwan University, Taipei 10617, Taiwan.

<sup>2</sup>Department of Chemical Engineering, National Chung Cheng University, Chia-Yi 62142, Taiwan.

<sup>3</sup>Institute of Polymer Science and Engineering, National Taiwan university, Taipei 10617, Taiwan

\*Author to whom all correspondence should be addressed: [chenwc@ntu.edu.tw](mailto:chenwc@ntu.edu.tw)(W. C. Chen); [chmjct@ccu.edu.tw](mailto:chmjct@ccu.edu.tw) (J. C. Tsai)

**Table S1.** Polymerization conditions, molecular weights, and thermal properties of azide-capped **sPP**, ethynyl-capped **P3HT** and the corresponding diblock copolymers, **P3HT-*b*-sPP**.

| Entry     | Polymer <sup>a</sup>     | $M_n^b$<br>(g/mol) | PDI <sup>b</sup> | H-T<br>ratio <sup>c</sup><br>(%) | [rrrr] <sup>d</sup><br>(%) | $T_d^e$<br>(°C) | $T_c^f$<br>(°C) |             | $T_m^f$<br>(°C) |             |
|-----------|--------------------------|--------------------|------------------|----------------------------------|----------------------------|-----------------|-----------------|-------------|-----------------|-------------|
|           |                          |                    |                  |                                  |                            |                 | <b>sPP</b>      | <b>P3HT</b> | <b>sPP</b>      | <b>P3HT</b> |
| <b>A1</b> | <b>P3HT<sub>1</sub></b>  | 16,000             | 1.13             | 97.5                             | —                          | —               | —               | —           | —               | —           |
| <b>A2</b> | <b>P3HT<sub>2</sub></b>  | 16,200             | 1.09             | 97.7                             | —                          | —               | —               | —           | —               | —           |
| <b>C1</b> | <b>sPP<sub>3k</sub></b>  | 3,400              | 1.25             |                                  | 87.5                       | 279.64          | —               | —           | —               | —           |
| <b>C2</b> | <b>sPP<sub>14k</sub></b> | 14,600             | 1.42             |                                  | 88.7                       | 367.76          | —               | —           | —               | —           |
| <b>P1</b> | <b>A1-<i>b</i>-C1</b>    | 19,000             | 1.13             |                                  | —                          | 418.35          | 58.16           | 190.16      | 118.62          | 223.12      |
| <b>P2</b> | <b>A2-<i>b</i>-C2</b>    | 31,800             | 1.30             |                                  | —                          | 407.92          | 88.52           | 183.16      | 147.10          | 222.55      |

<sup>a</sup> Propylene polymerization condition: toluene 50 mL; [Zr]= $2.5 \times 10^{-6}$  mole; Al/Zr=2000; propylene pressure = 1 bar; time = 30 min; Temperature,  $T_p=25$  °C.

<sup>b</sup> Molecular weight ( $M_n$ ) and molecular weight distribution ( $M_w/M_n$ , PDI) were determined by high-temperature GPC at 110 °C with 1,2,4-chlorobenzene as solvent.

<sup>c</sup> Head-to-tail (H-T) ratio was determined by <sup>1</sup>H NMR analyses.

<sup>d</sup> Syndiotacticity (rrrr) was determined by <sup>13</sup>C NMR analyses.

<sup>e</sup> Decomposed temperature ( $T_d$ ) was obtained from TGA analyses.

<sup>f</sup> Crystallization temperature ( $T_c$ ) and Melting point ( $T_m$ ) were obtained from DSC analyses.

**Table S2.** The calculated results of Flory-Huggins interaction parameter between polymer and solvent ( $\chi_{\text{polymer-solvent}}$ ).

| CF content (vol %) | $\chi_{\text{P3HT-solvent}}$ | $\chi_{\text{sPP-solvent}}$ |
|--------------------|------------------------------|-----------------------------|
| 100                | 0.031                        | 0.394                       |
| 70                 | 0.097                        | 0.282                       |
| 30                 | 0.262                        | 0.146                       |

The Flory-Huggins interaction parameter between the assigned polymer block and the solvent mixture,  $\chi_{\text{polymer-solvent}}$ , is generally employed to predict the microphase separation inside the block copolymers. Equation 1 is generally employed to calculate  $\chi_{\text{polymer-solvent}}$ , which is correlated to the solubility parameters  $\delta$  of both the assigned polymer and the solvent mixture:

$$\chi_{\text{polymer-solvent}} = (\delta_{\text{polymer}} - \delta_{\text{solvent}})^2 \tilde{V} / RT \quad (1)$$

where  $T$  is the temperature,  $R$  is the gas constant, and  $\tilde{V}$  is the molar volume of the solvent mixture.

Moreover, the values of  $\delta_{\text{solvent}}$  and  $\tilde{V}$  may vary with the solvent ratios of solvent mixture. Therefore, the simple addition rule is commonly applied:

$$\delta_{\text{solvent}} = X_{v,1} \delta_1 + X_{v,2} \delta_2 \quad (2)$$

where  $\delta_{\text{mixture}}$  is the solubility parameter of a solvent mixture,  $X_{v,1}$  is the volume fraction of solvent 1 with solubility parameter  $\delta_1$ ,  $X_{v,2}$  is the volume fraction of solvent 2 with

solubility parameter  $\delta_2$ . Same rule is applied to obtain the molar volume of the solvent mixture  $\tilde{V}$ :

$$\tilde{V} = X_{v,1}\tilde{V}_1 + X_{v,2}\tilde{V}_2 \quad (3)$$

In our case, the polymer 1 and 2 are CF and CH, respectively.<sup>[1-3]</sup>

## References

- [1] Y.-H. Lee, W.-C. Yen, W.-F. Su, C.-A. Dai, *Soft Matter* **2011**, 7, 10429.
- [2] Y. Lee, J. K. Kim, C.-H. Chiu, Y.-K. Lan, C.-I. Huang, *Polymer* **2009**, 50, 4944.
- [3] D. Pospiech, A. Gottwald, D. Jehnichen, P. Friedel, A. John, C. Harnisch, D. Voigt, G. Khimich, A. Bilibin, *Colloid. Polym. Sci.* **2002**, 280, 1027.

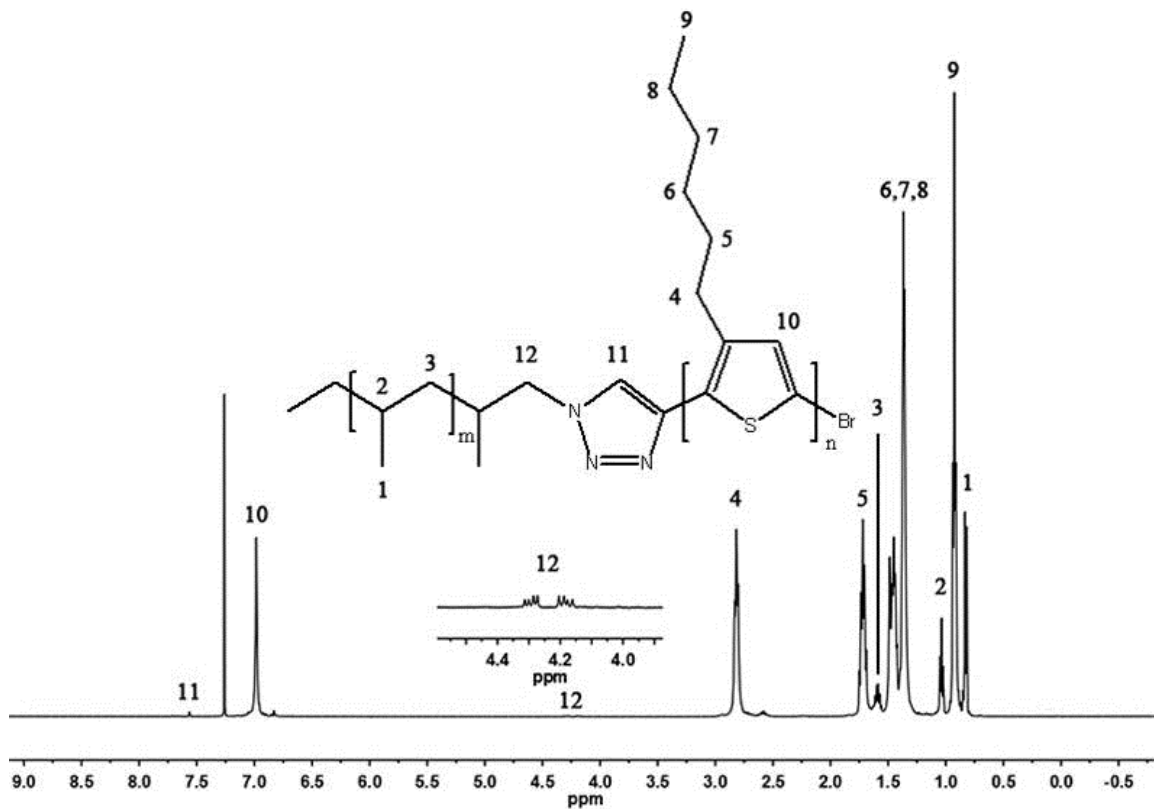

**Figure S1.** <sup>1</sup>H NMR Spectra (500 MHz) of P1 (P3HT<sub>16K</sub>-b-sPP<sub>3K</sub>) ( $M_n = 19000$  g/mol; PDI = 1.14; P3HT H-T ratio = 97.5 %) in CDCl<sub>3</sub> (temperature = 50°C).

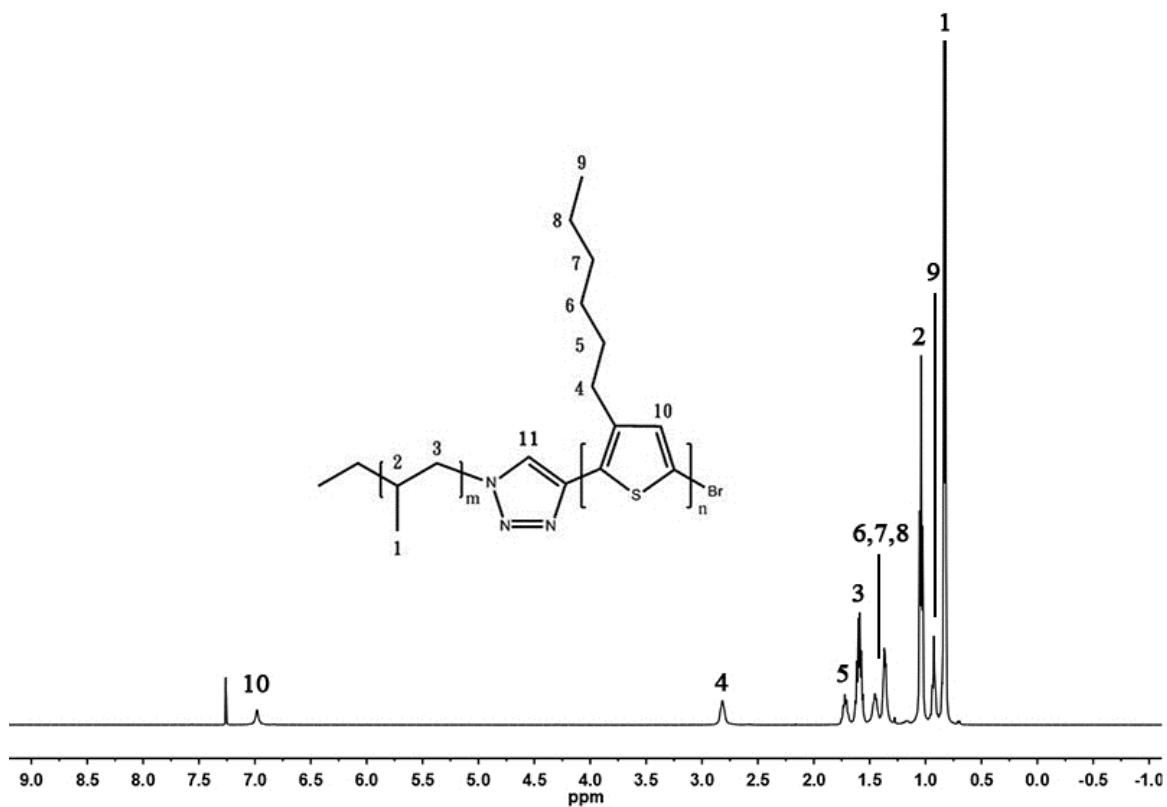

**Figure S2.** <sup>1</sup>H NMR Spectra (500 MHz) of P2 (P3HT<sub>16K</sub>-*b*-sPP<sub>14K</sub>) ( $M_n = 31800$  g/mol; PDI = 1.30; P3HT H-T ratio = 97.7 %) in CDCl<sub>3</sub> (temperature = 50°C).

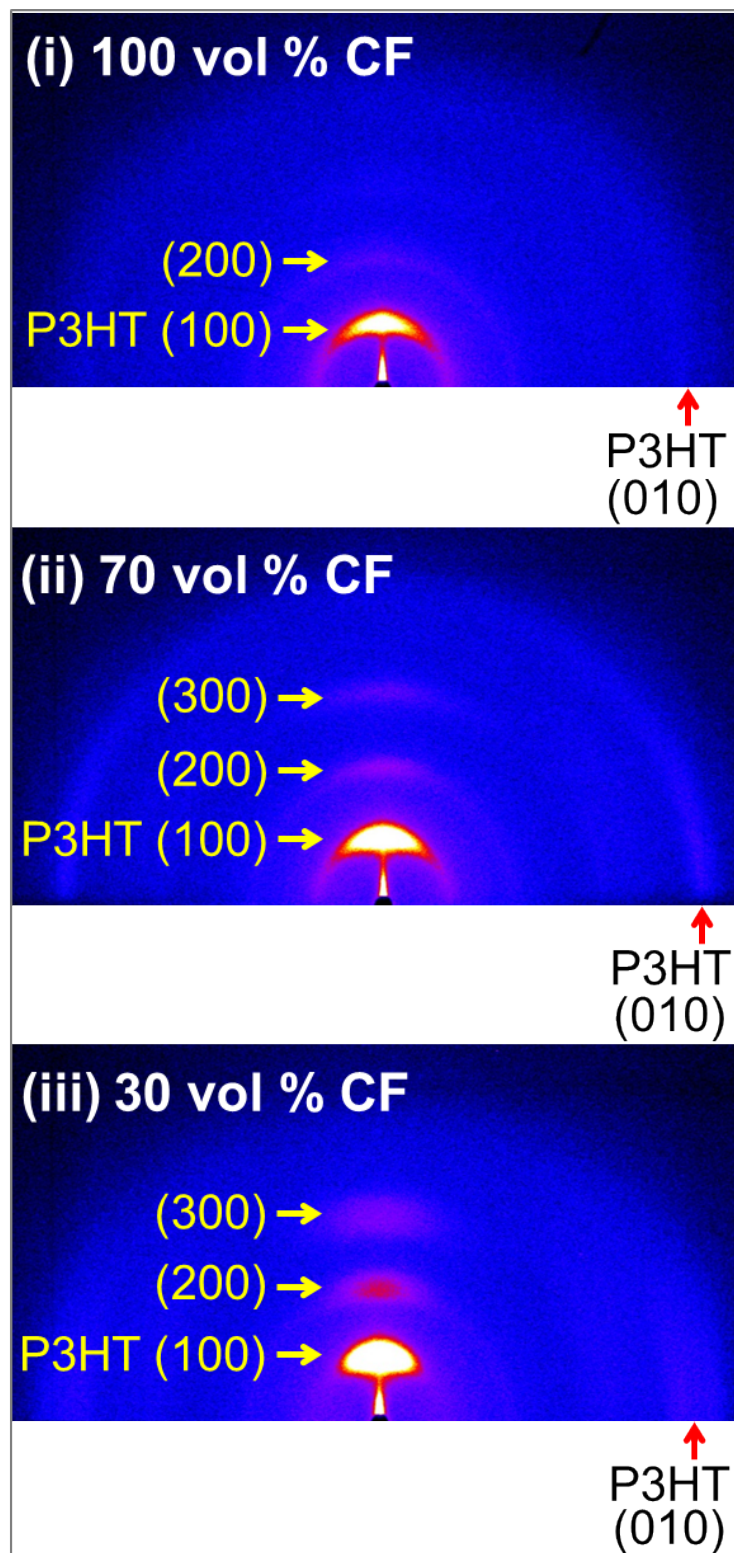

**Figure S3.** Two-dimensional GIWAXS patterns of **P3HT** homopolymer prepared from

solvent mixtures with different CF content (vol. %).

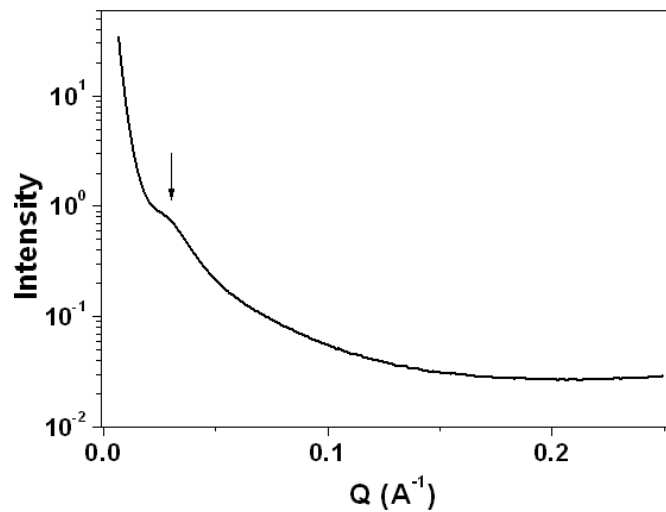

**Figure S4.** SAXS measurements on the P1 sample prepared from pure chloroform (CF) without further annealing
